# Supplementary material for: Coupling liquid chromatography and inductively coupled plasma-mass spectrometry with ultrasonic nebulization for chromium speciation in rice
Source: Royal Society of Chemistry journal article supplement (doi:10.1039/d0ja00356e), 2020-10-30
Supplement: d0ja00356e1.pdf [file d0ja00356e1.pdf]

Supplementary Information

**Coupling liquid chromatography and inductively coupled plasma-  
mass spectrometry with ultrasonic nebulization for chromium  
speciation in rice**

Bo-Hao Chen,<sup>a</sup> Ru-Ying Ruan<sup>a</sup> and Shiuh-Jen Jiang,<sup>a,b,\*</sup>

<sup>a</sup> *Department of Chemistry, National Sun Yat-sen University, Kaohsiung 80424, Taiwan*

<sup>b</sup> *Department of Medical Laboratory Science and Biotechnology, Kaohsiung Medical  
University, Kaohsiung 80708, Taiwan*

\* Corresponding author. Fax: 886-7-5253908; E-mail: [sjjiang@faculty.nsysu.edu.tw](mailto:sjjiang@faculty.nsysu.edu.tw)

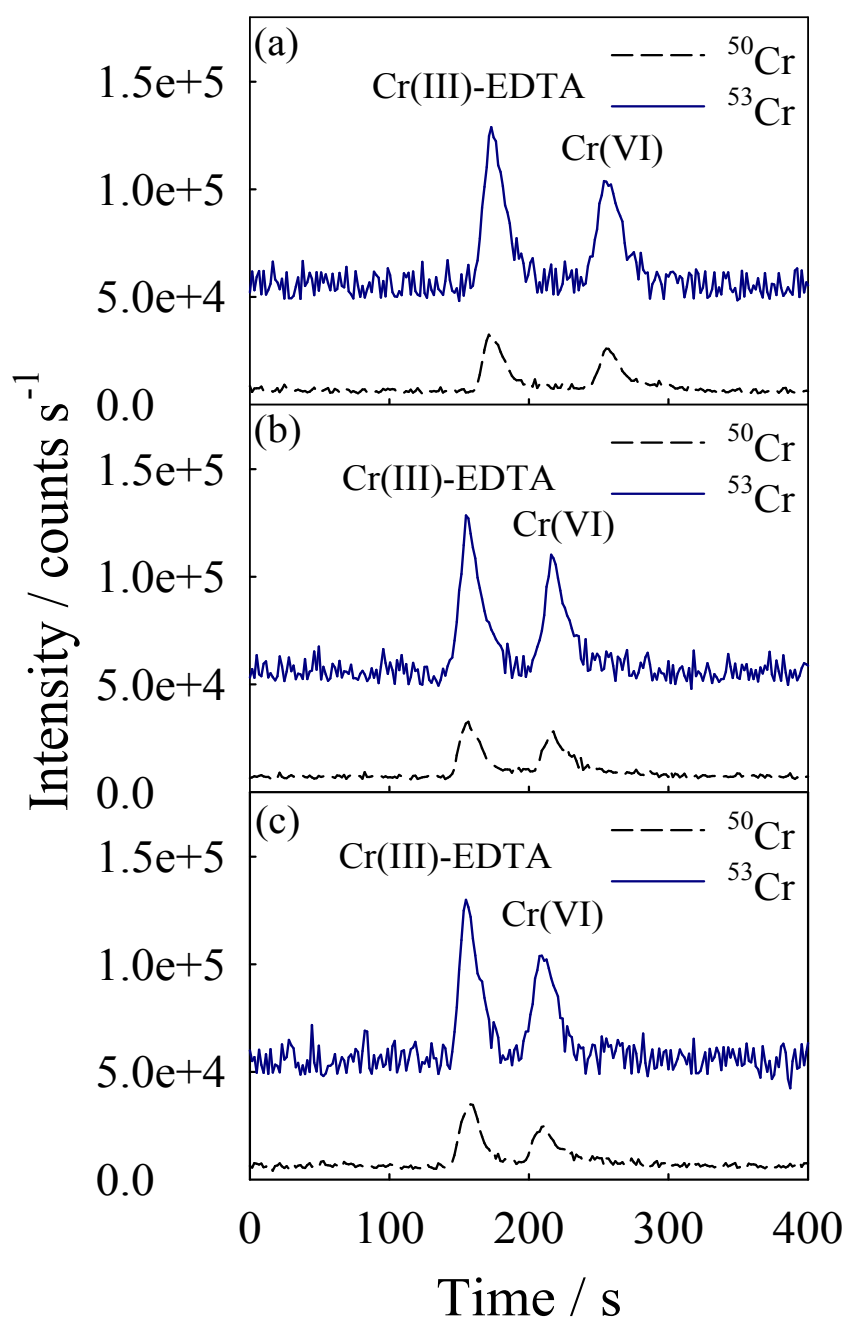

**Fig. S1** Effect of EDTA concentration on chromatogram: (a) 0.1 mmol L<sup>-1</sup> (b) 0.15 mmol L<sup>-1</sup> and (c) 0.2 mmol L<sup>-1</sup>. Mobile phase contained 0.5 mmol L<sup>-1</sup> TBAP and various concentrations of EDTA in 3% (v/v) methanol (pH 6.9). Each chromium species was present at 50 ng Cr mL<sup>-1</sup>. Mobile phase flow rate was 1.0 mL min<sup>-1</sup>. No reaction gas was used. Carrier gas flow rate of USN was 1.3 L min<sup>-1</sup>; desolvation tube temperature was 120 °C; condenser temperature was -2 °C.

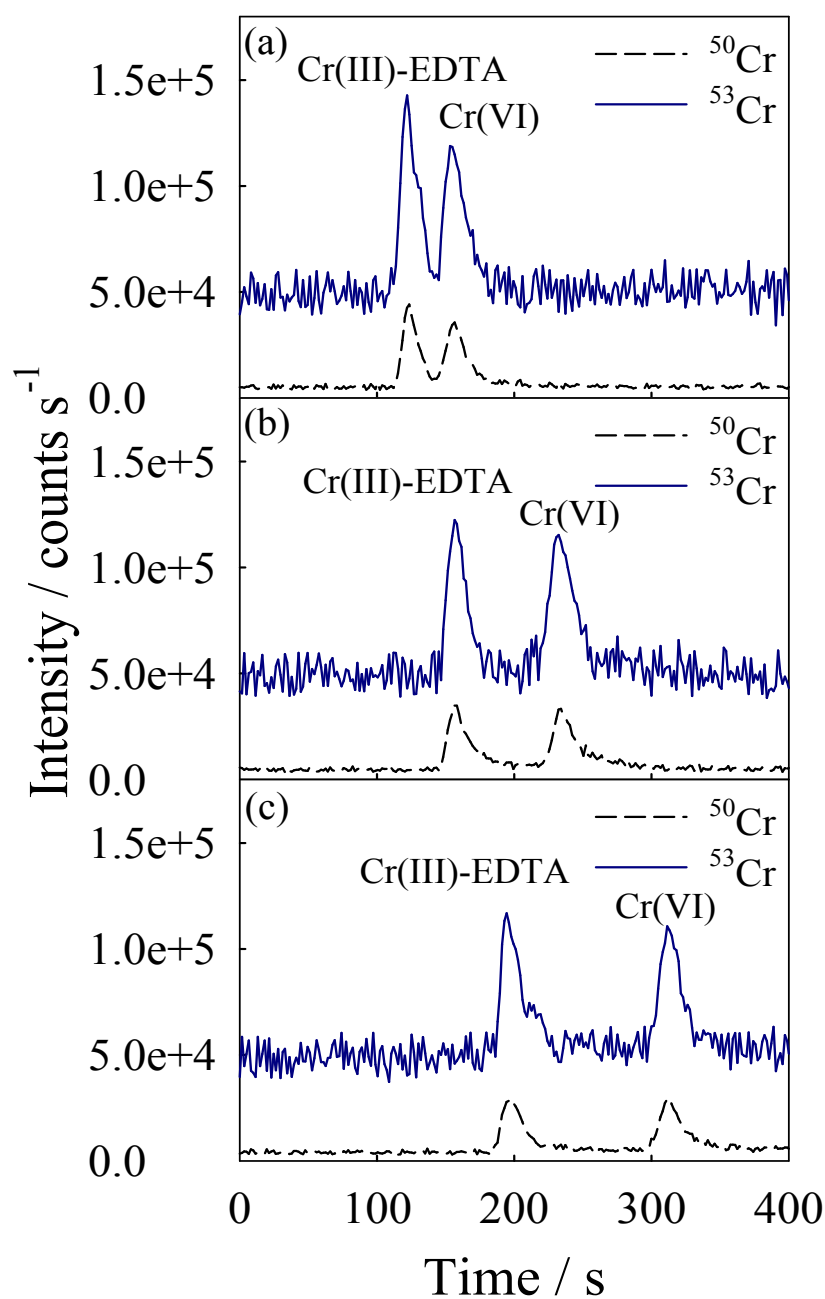

**Fig. S2** Effect of TBAP concentration in mobile phase on separation: (a) 0.25 mmol L<sup>-1</sup> (b) 0.5 mmol L<sup>-1</sup> and (c) 0.75 mmol L<sup>-1</sup>. Mobile phase contained 0.1 mmol L<sup>-1</sup> EDTA and various concentrations of TBAP in 3% (v/v) methanol (pH 6.9). Each chromium species was present at 50 ng Cr mL<sup>-1</sup>. Mobile phase flow rate was 1.0 mL min<sup>-1</sup>. No reaction gas was used.

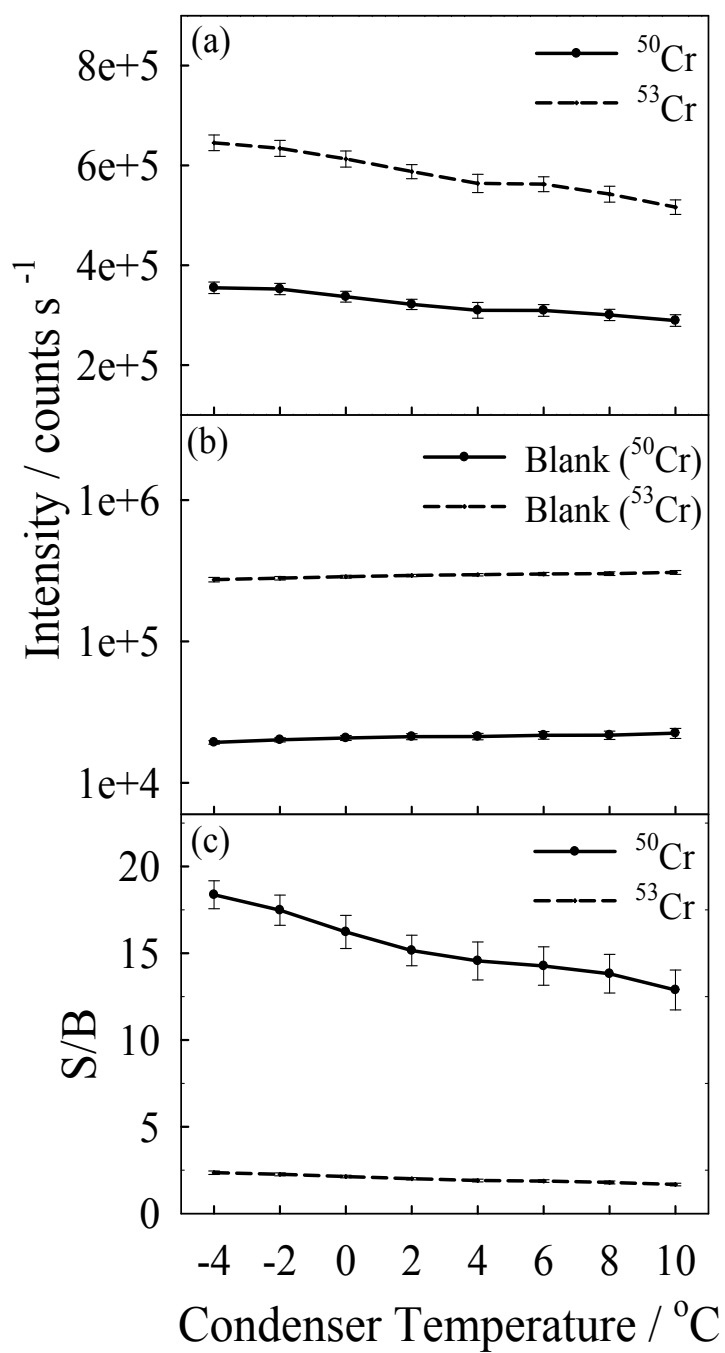

**Fig. S3** Effect of condenser temperature on Cr ion signal and the blank signal. The desolvation tube temperature was set at 120 °C and carrier gas flow rate was set at 1.1 L min<sup>-1</sup>.

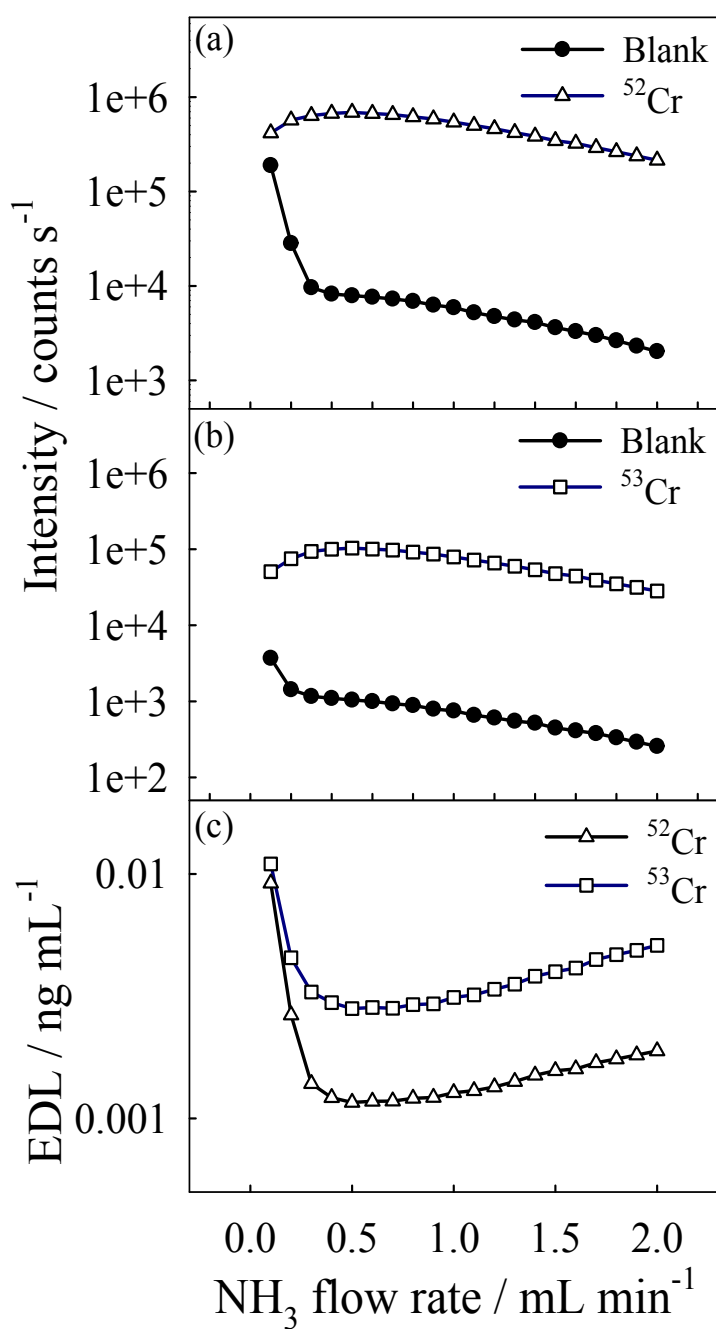

**Fig. S4** Effect of  $\text{NH}_3$  reaction gas flow rate on the ion signals of  $^{52}\text{Cr}^+$ ,  $^{53}\text{Cr}^+$ , the blank and estimated detection limit (EDL). The concentration of Cr was  $3 \text{ ng mL}^{-1}$ . The mobile phase solution spiked with  $300 \text{ ng mL}^{-1}$  Cl was treated as blank. Rejection parameter  $q = 0.55$ ,  $a = 0.0$ .

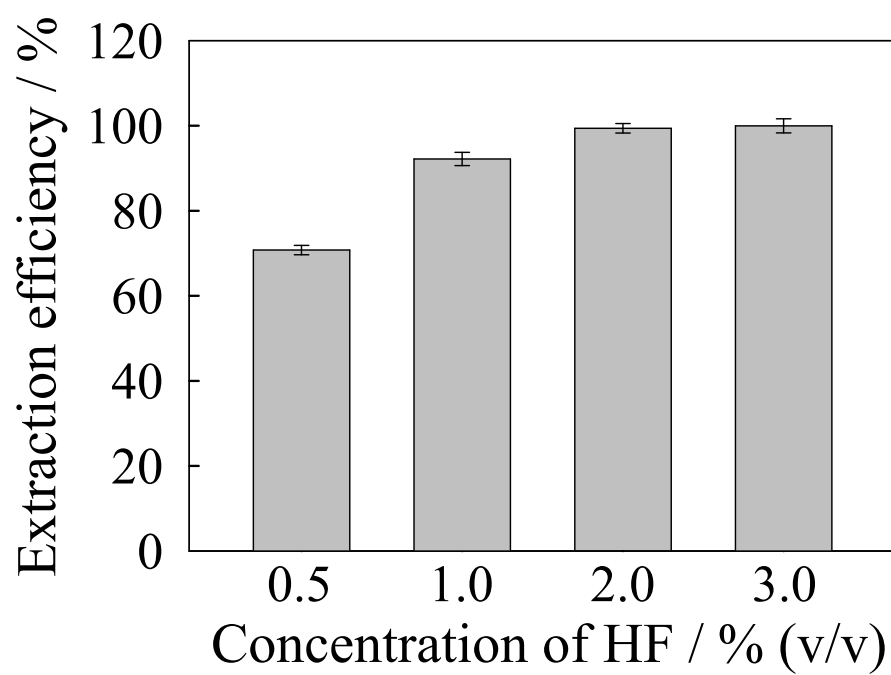

**Fig. S5** Effect of HF concentration on extraction efficiency. The extraction solution contained 2 mmol L<sup>-1</sup> EDTA and various concentration of HF.

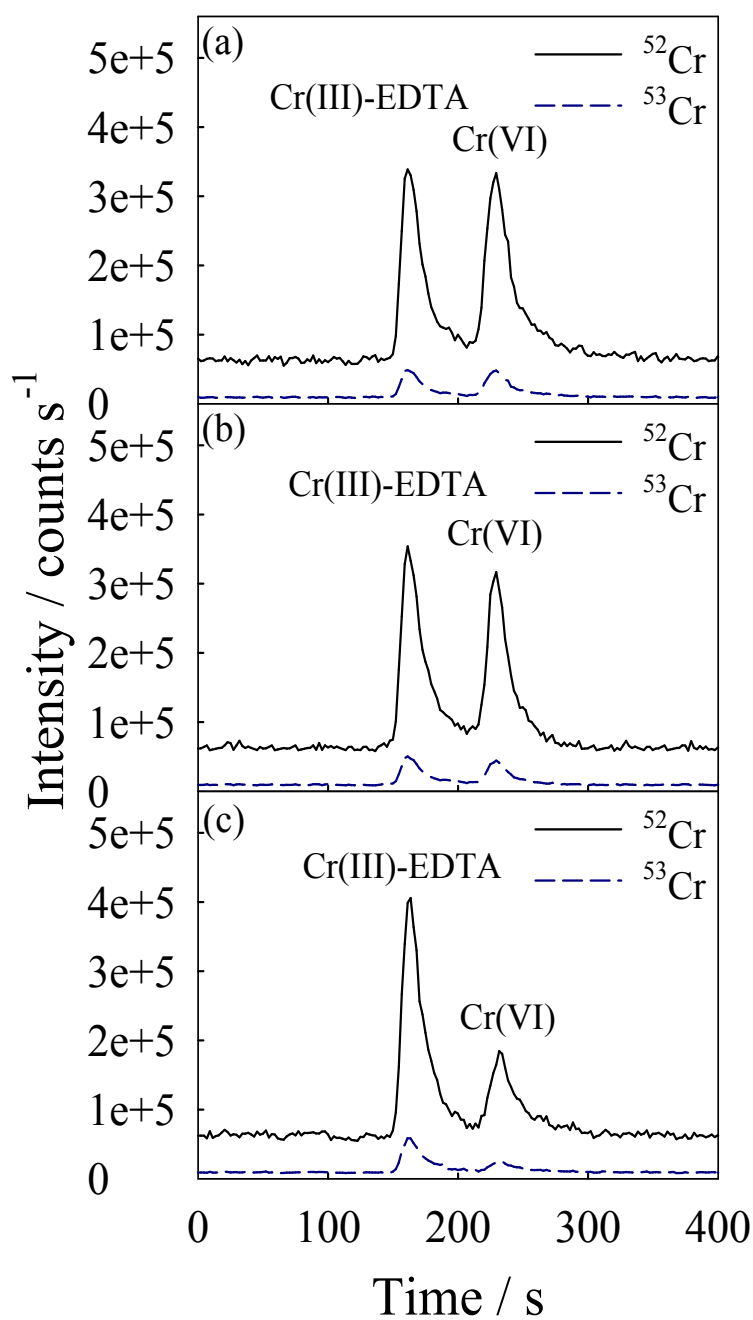

**Fig. S6** Effect of HF concentration in extracting solution on the stability of Cr(VI). (a) 0.5% (v/v), (b) 1% (v/v), and (c) 2% (v/v).
